# Supplementary material for: Synthesis of rod-like metal–organic framework materials as an electrochemical aptamer sensor for sensitive detection of tetracycline
Source: Royal Society of Chemistry journal article supplement (doi:10.1039/d4ce01141d), 2025-01-01
Supplement: d4ce01141d1.pdf [file d4ce01141d1.pdf]

Synthesis of rod-like metal-organic framework materials as  
electrochemical aptamer sensor for sensitive detection of tetracycline  
Yuting Luo, Yiwei Sun, Haoxiang Wang, Yuyang He, Mengqi Lu, Ruoyu

Wang, Dongpo Xu\*

School of Health Science and Engineering, University of Shanghai for Science  
and Technology, Shanghai 200093, PR China.

\*Corresponding author: xudongpo@usst.edu.cn

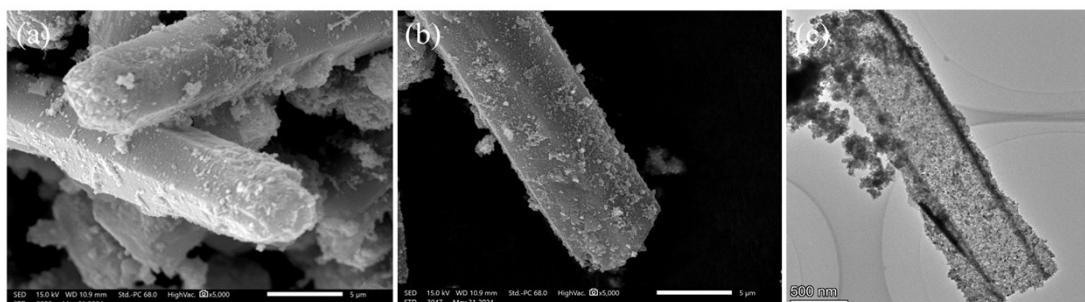

Fig. S1. (a-b) SEM images and (c) TEM images of NH<sub>2</sub>-MIL-68 (In).

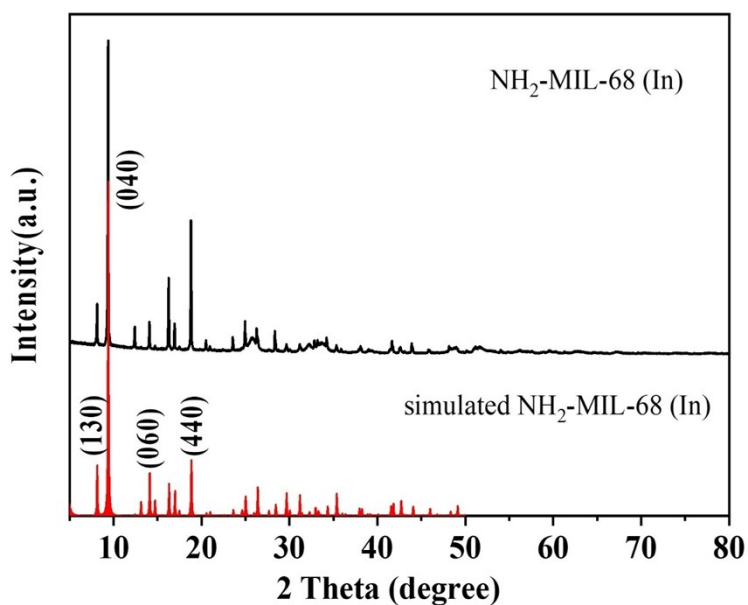

Fig. S2. The XRD of the NH<sub>2</sub>-MIL-68 (In).

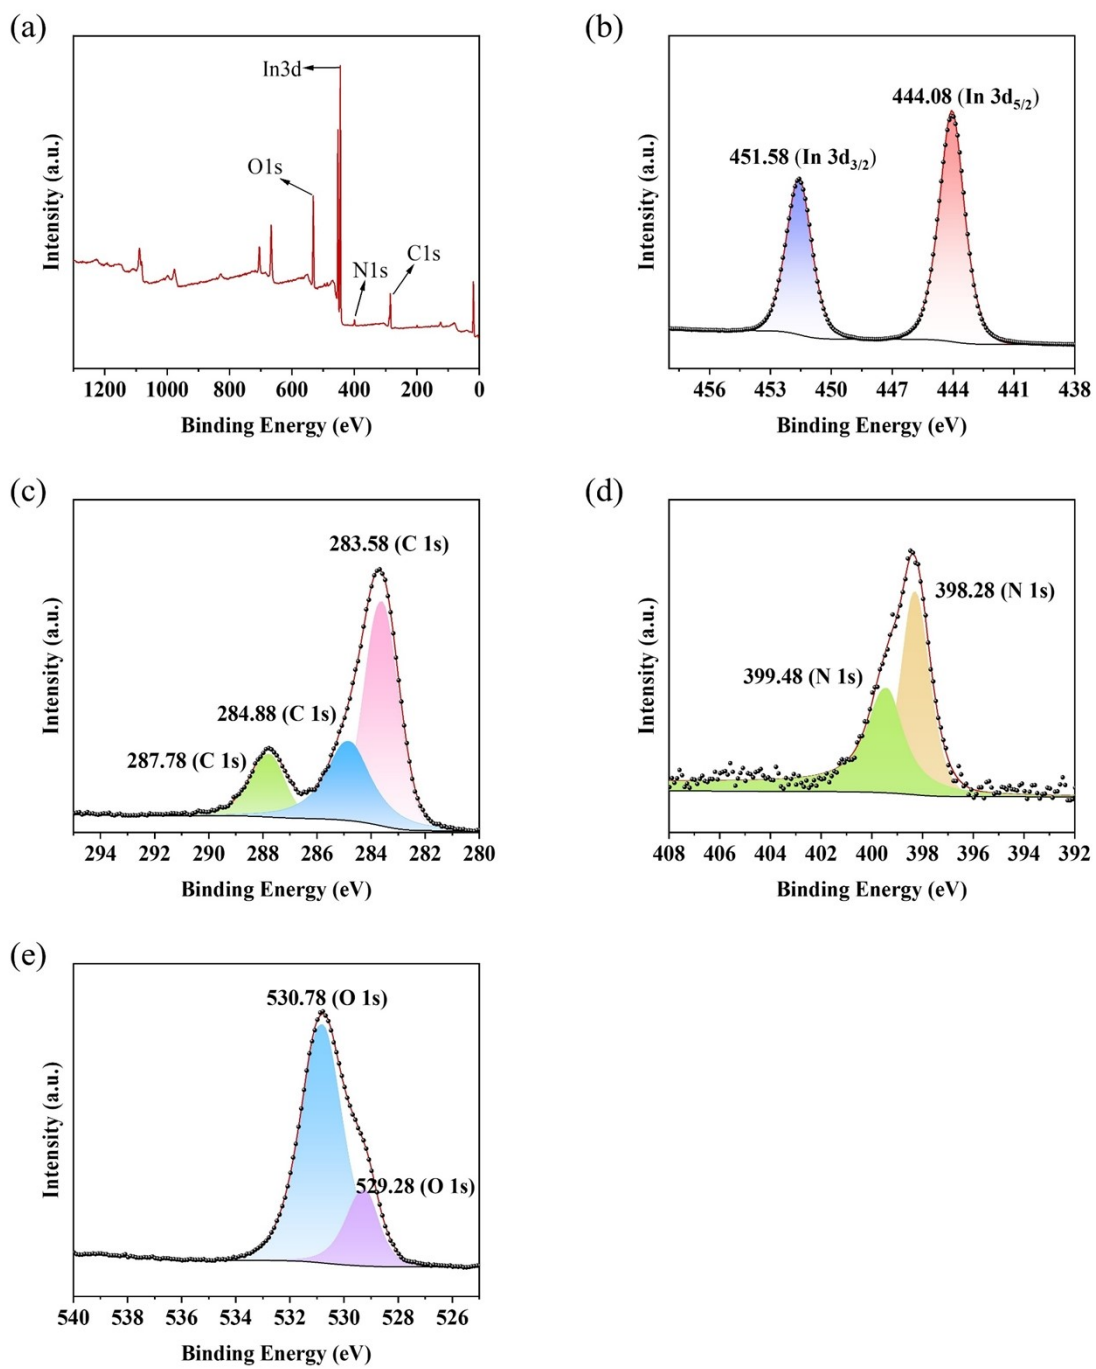

Fig. S3. The XPS of the NH<sub>2</sub>-MIL-68 (In): Survey spectra(a); (b–e): high-resolution XPS for In 3d, C 1s, N 1s and O 1s.

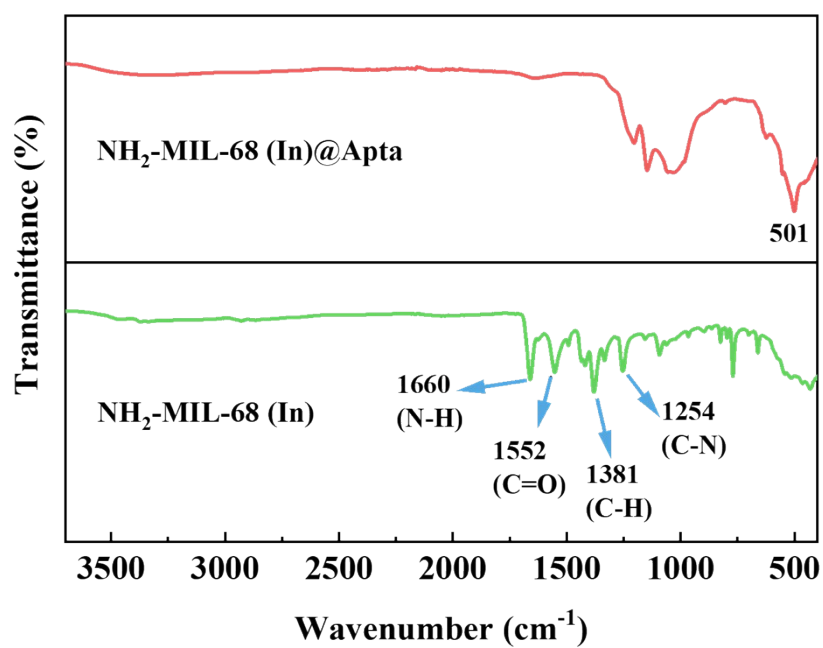

Fig. S4. The FT-IR spectra of  $\text{NH}_2\text{-MIL-68 (In)}$  and  $\text{NH}_2\text{-MIL-68 (In)@Apta}$ .

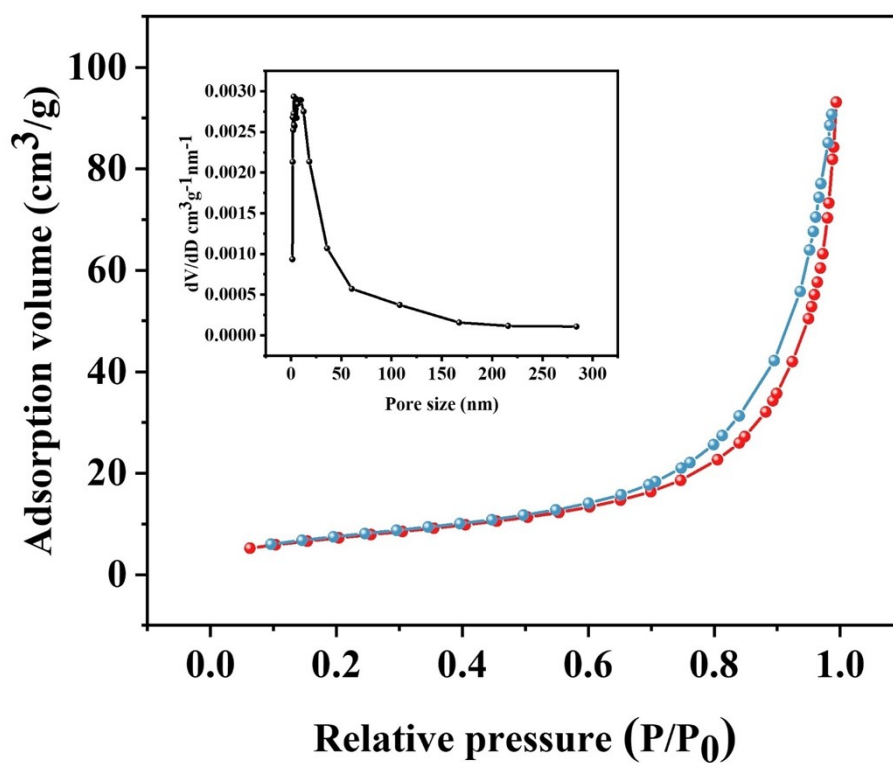

Fig. S5.  $\text{N}_2$  isotherm of  $\text{NH}_2\text{-MIL-68 (In)}$  (Inset: pore-size distribution of  $\text{NH}_2\text{-MIL-68 (In)}$ ).

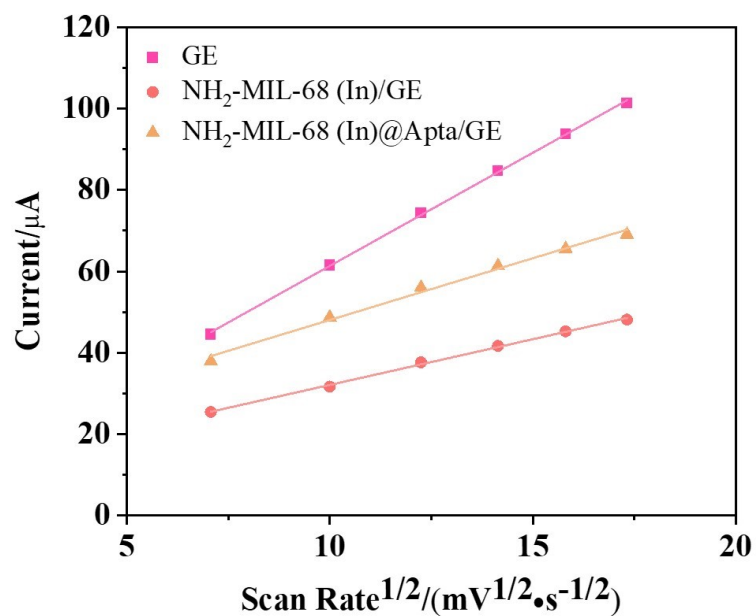

Fig. S6. The calibration curve of the oxidation peak-to-peak current and the square root of the scan rate of GE, NH<sub>2</sub>-MIL-68 (In)/GE and NH<sub>2</sub>-MIL-68 (In)@Apta/GE.
